# Supplementary material for: The Gut of Geographically Disparate Ciona intestinalis Harbors a Core Microbiota
Source: PubMed Central journal article supplement (PMC3973685; doi:10.1371/journal.pone.0093386), 2014-04-02
Supplement: pone.0093386.s001.pdf [file pone.0093386.s001.pdf]

Number of Shared OTUs

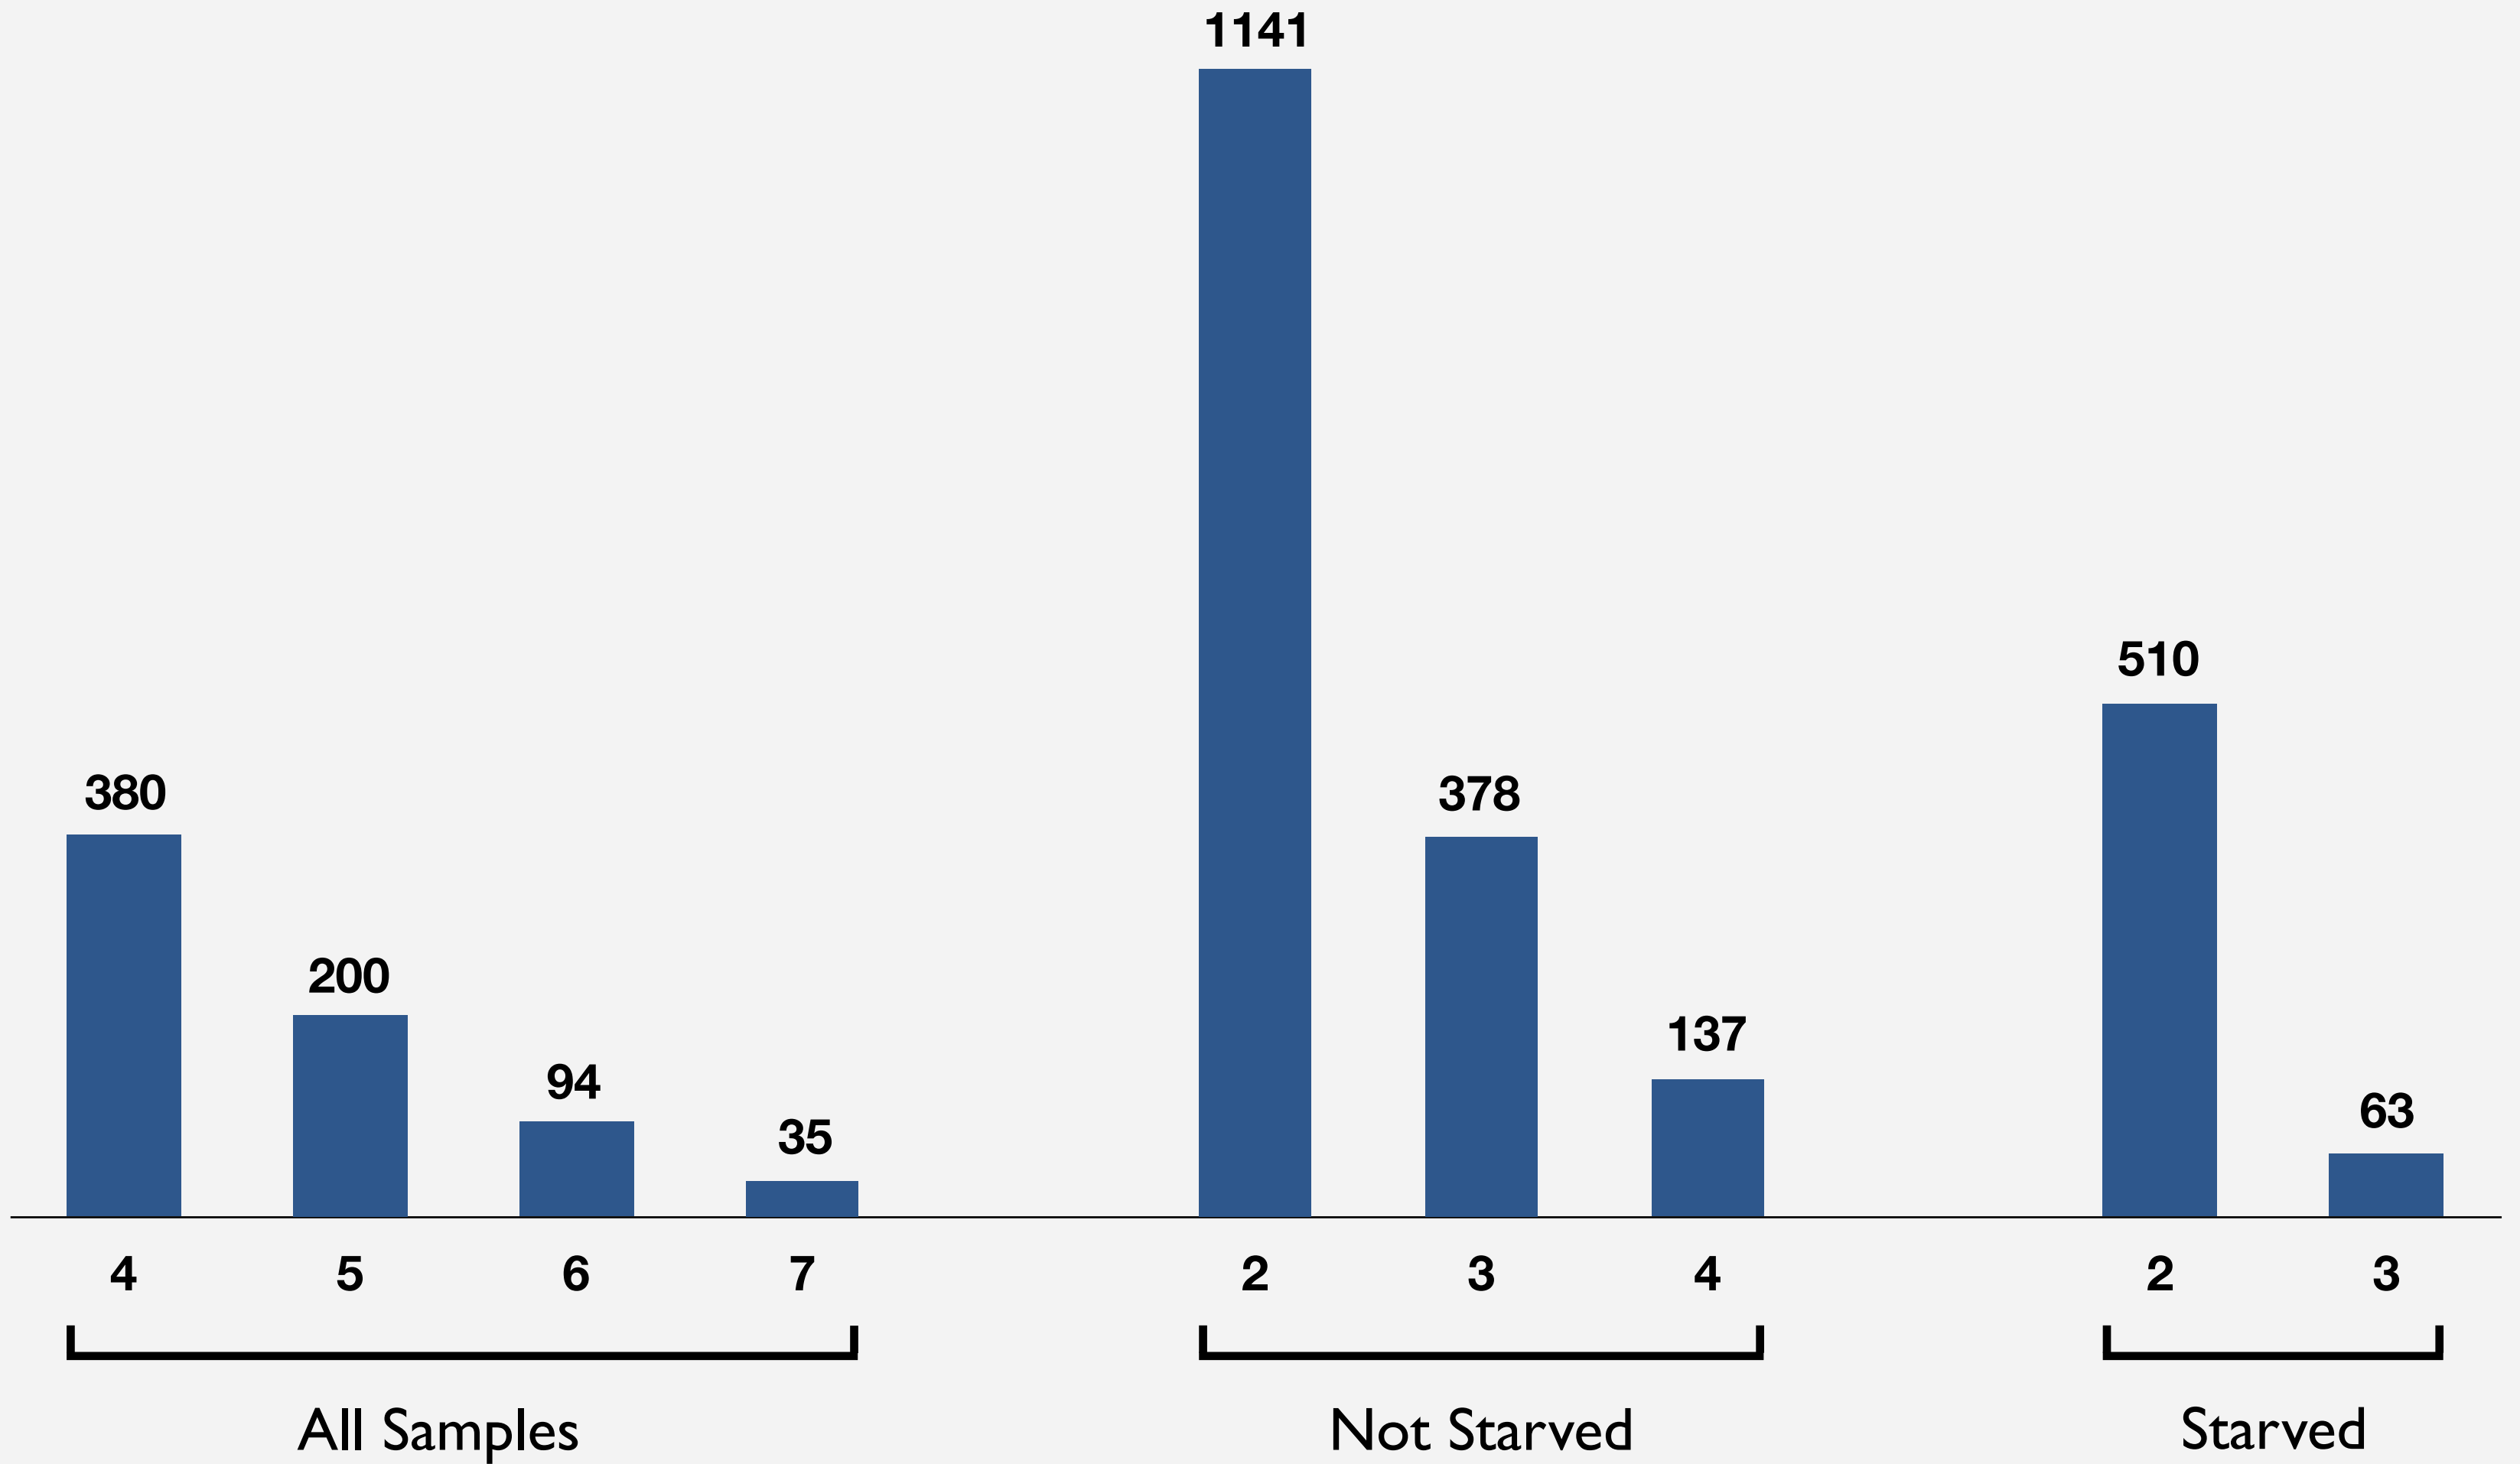

Number of Samples Containing Shared OTU
